# Supplementary material for: Septin 9 and phosphoinositides regulate lysosome localization and their association with lipid droplets
Source: PubMed Central journal article supplement — iScience. 2022 Apr 25;25(5):104288. doi: 10.1016/j.isci.2022.104288 (PMC9097704; doi:10.1016/j.isci.2022.104288), 2022-04-25
Supplement: mmc1.pdf [file mmc1.pdf]

**iScience, Volume 25**

**Supplemental information**

**Septin 9 and phosphoinositides regulate  
lysosome localization and their  
association with lipid droplets**

**Pei Xuan Song, Juan Peng, Mohyeddine Omrane, Ting ting Cai, Didier Samuel, and Ama  
Gassama-Diagne**

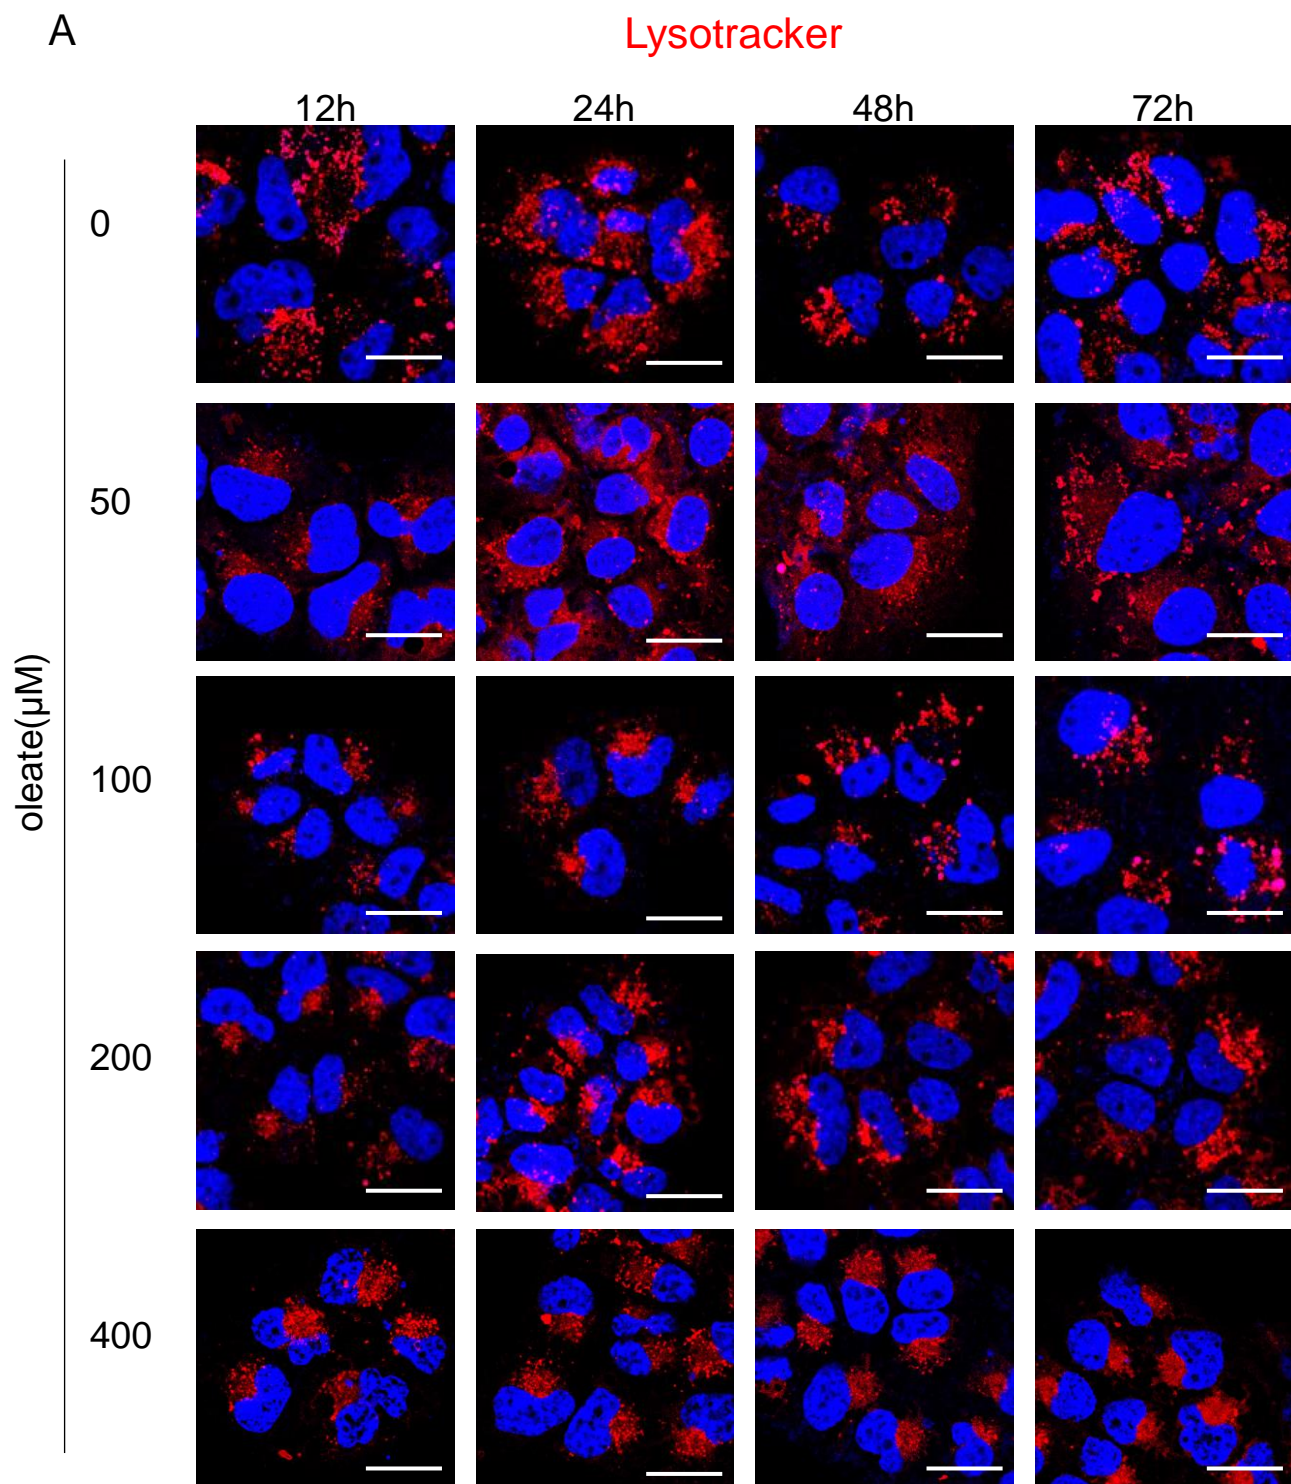

**Figure S1 Oleate treatment induces acidic vesicles redistribution**

**A.** Huh7 cells were grown for 24h. the culture medium was supplemented with or without 50, 100, 200, 400  $\mu\text{M}$  sodium oleate complex for different time points (12h, 24h, 48h, 72h), then stained with Lysotracker(red). Scale bar, 20 $\mu\text{m}$ .

Figure S2 Analysis of lysosomal genes in oleate treated cells and LAMP1-Bodipy interaction, related to Figure 1

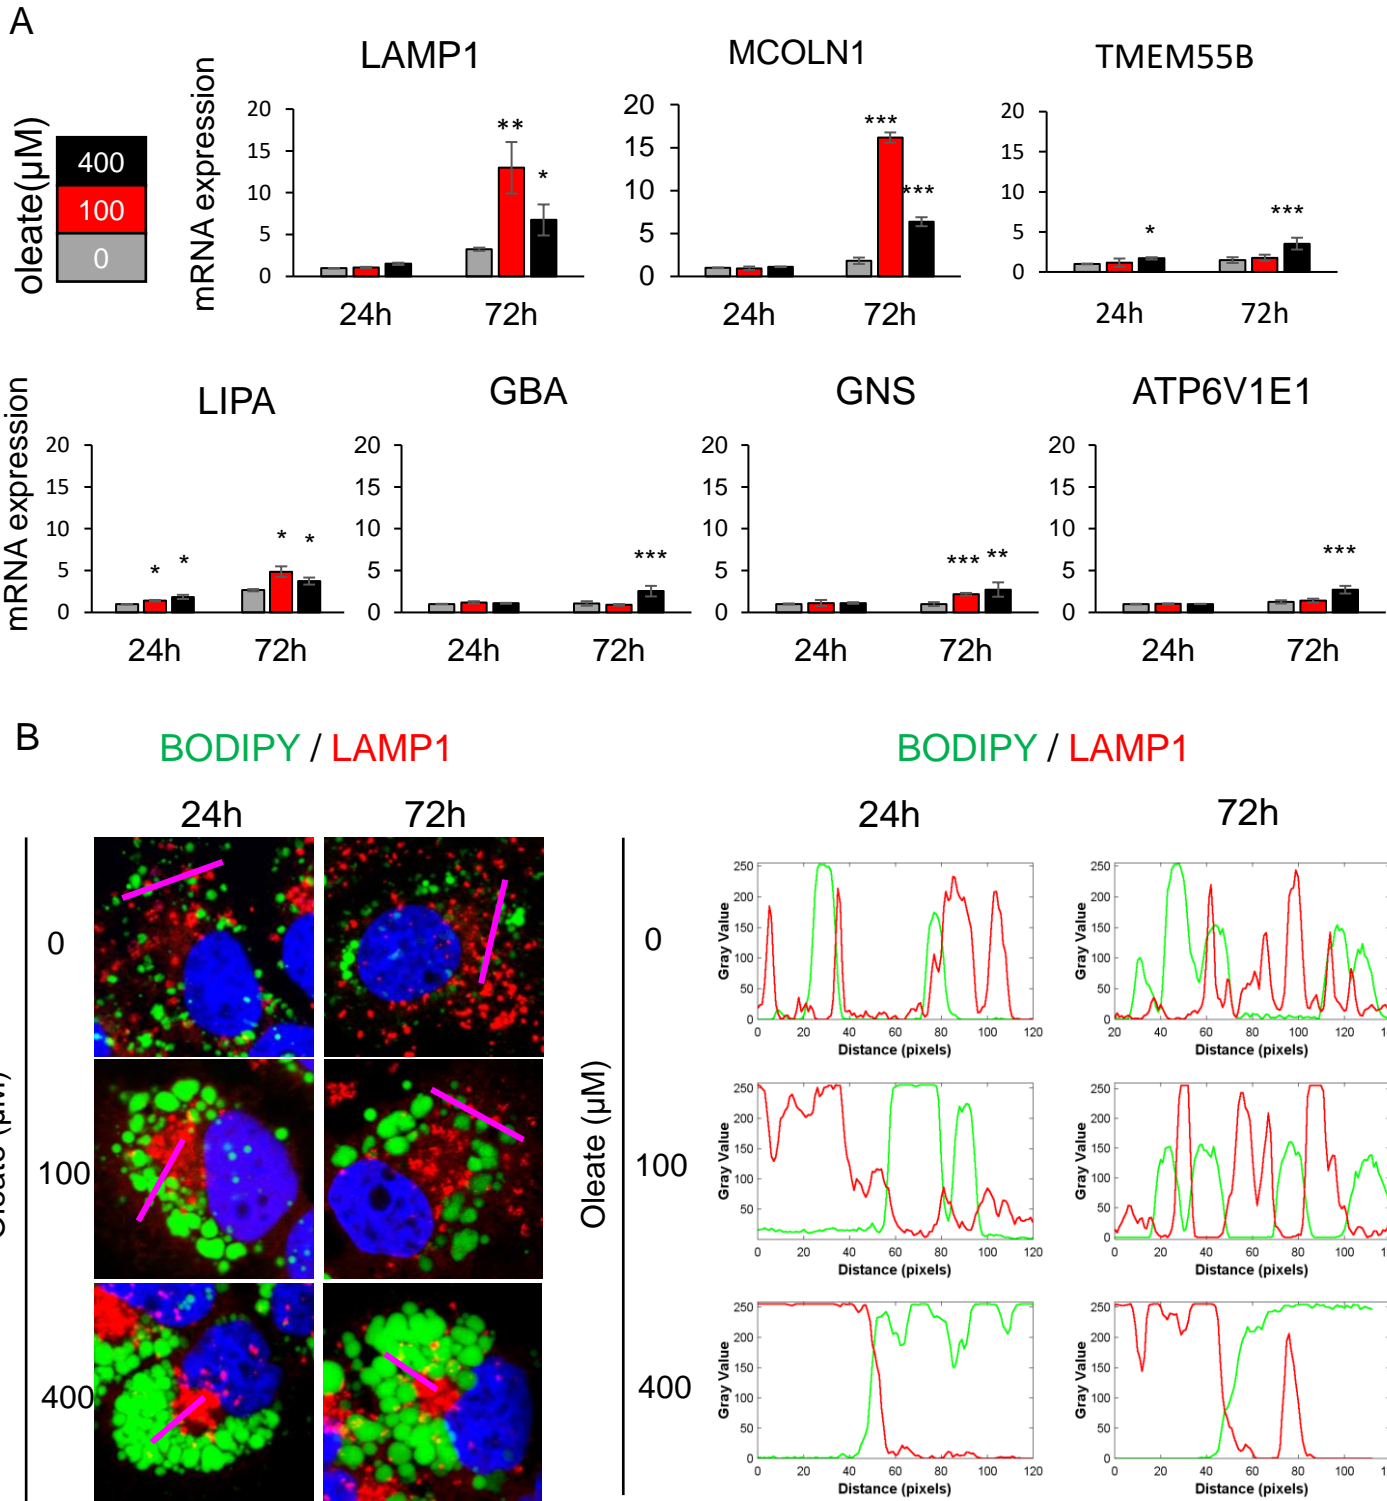

**Figure S2 Analysis of lysosomal genes in oleate treated cells and LAMP1-Bodipy interaction**

**A.** Huh7 cells were grown overnight. Then culture medium was supplemented without or with 100 and 400  $\mu\text{M}$  sodium oleate complex for different time (24h, 72h), mRNA was extracted, and RT-PCR were performed for LAMP1, TMEM55B, MCOLN1, GBA, GNS, LIPA and ATP6V1E1.

**B.** The line plots for LAMP1 and BODIPY were performed for cells treated with 0,100 and 400  $\mu\text{M}$  sodium oleate complex for different time (24h, 72h).

Data information: Bar graphs present Mean  $\pm$  SEM. Student's t-test was used. \*P < 0.05, \*\*P < 0.001, \*\*\*P < 0.0001.

Figure S3 Knockdown of septin 9 disrupts oleate-induced LDs accumulation and lysosome perinuclear clustering, related to Figure 2

A

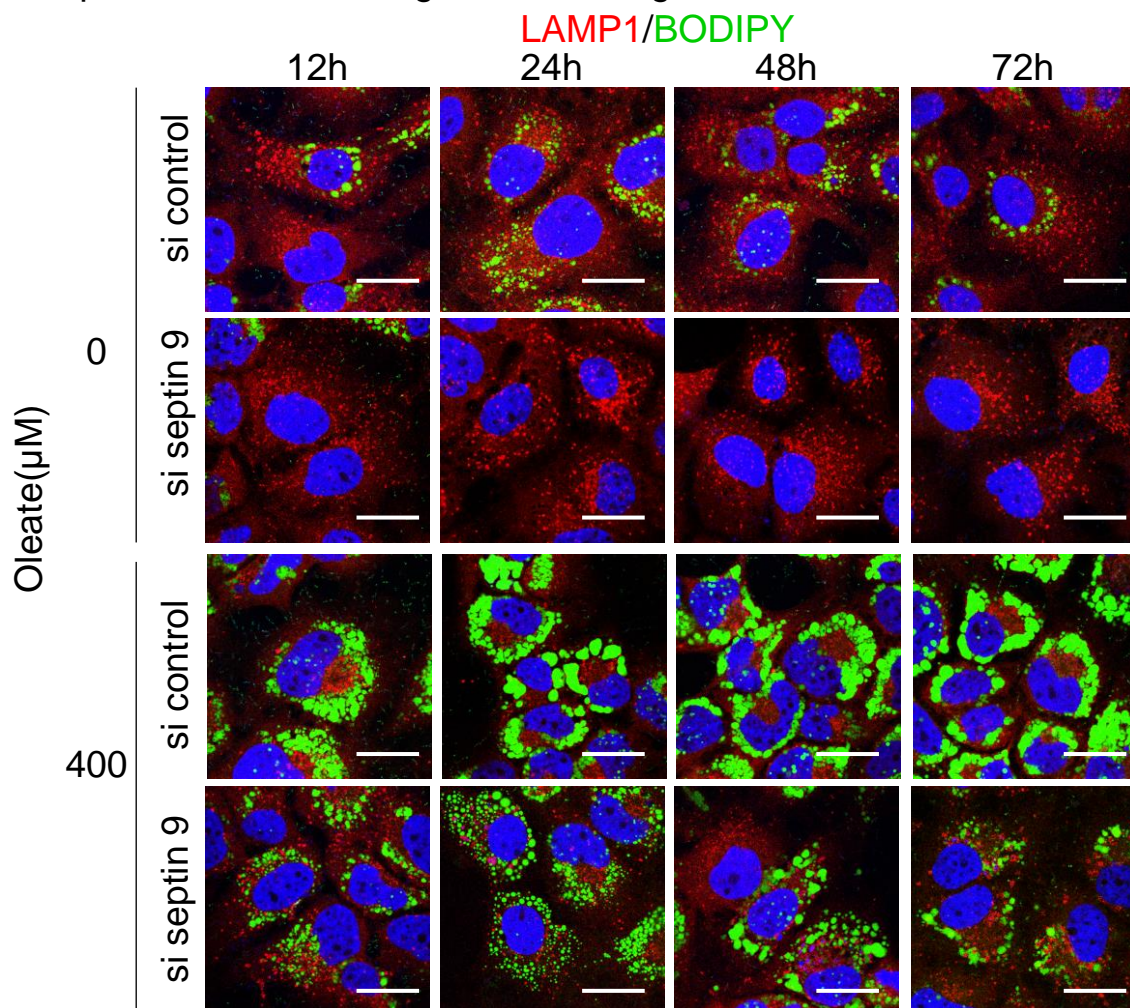

B

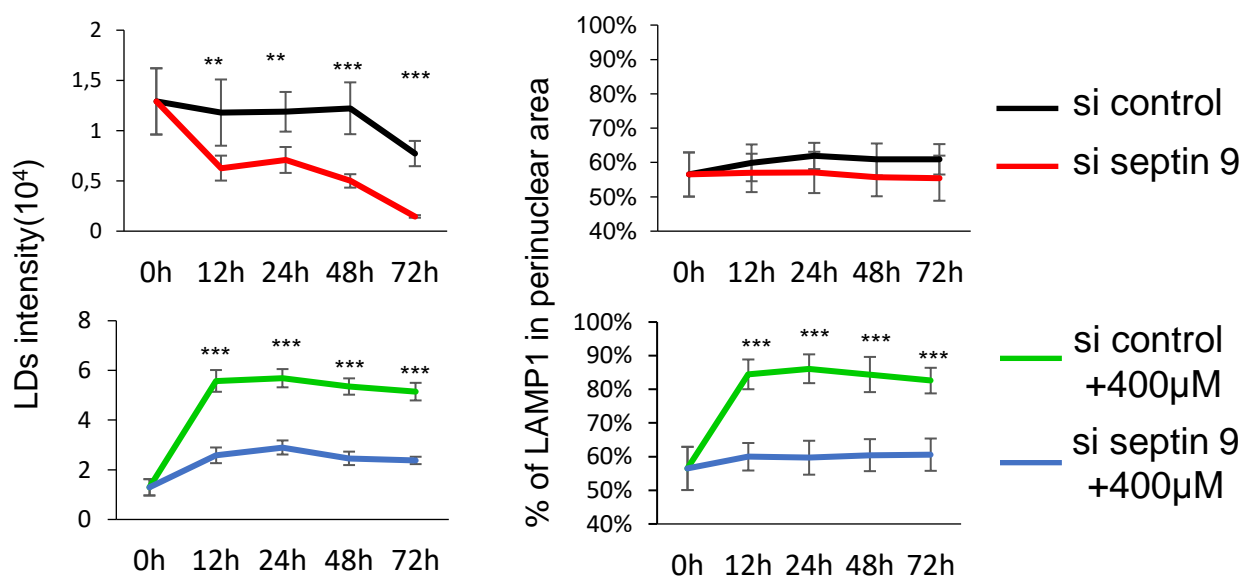

**Figure S3 Knockdown of septin 9 disrupts oleate-induced LDs accumulation and lysosome perinuclear clustering**

**A.** Huh7 cells were transfected with or not septin 9-siRNA for 24h then culture with medium supplemented with or not 400 μM oleate for different time. Then stained for BODIPY (green) and LAMP1 (red). Scale bar, 20μm.

**B.** Fluorescence intensity of LD and the percentage of LAMP1 in perinuclear area were analyzed in 25 cells from two experiments performed as described in A.

Data information: Line graphs present Mean ± SEM. Student's t-test was used. \*P < 0.05, \*\*P < 0.001, \*\*\*P < 0.0001.

Figure S4 Septin 9\_i1 overexpression maintains the colocalization of LAMP1 and TGN46, related to Figure 3

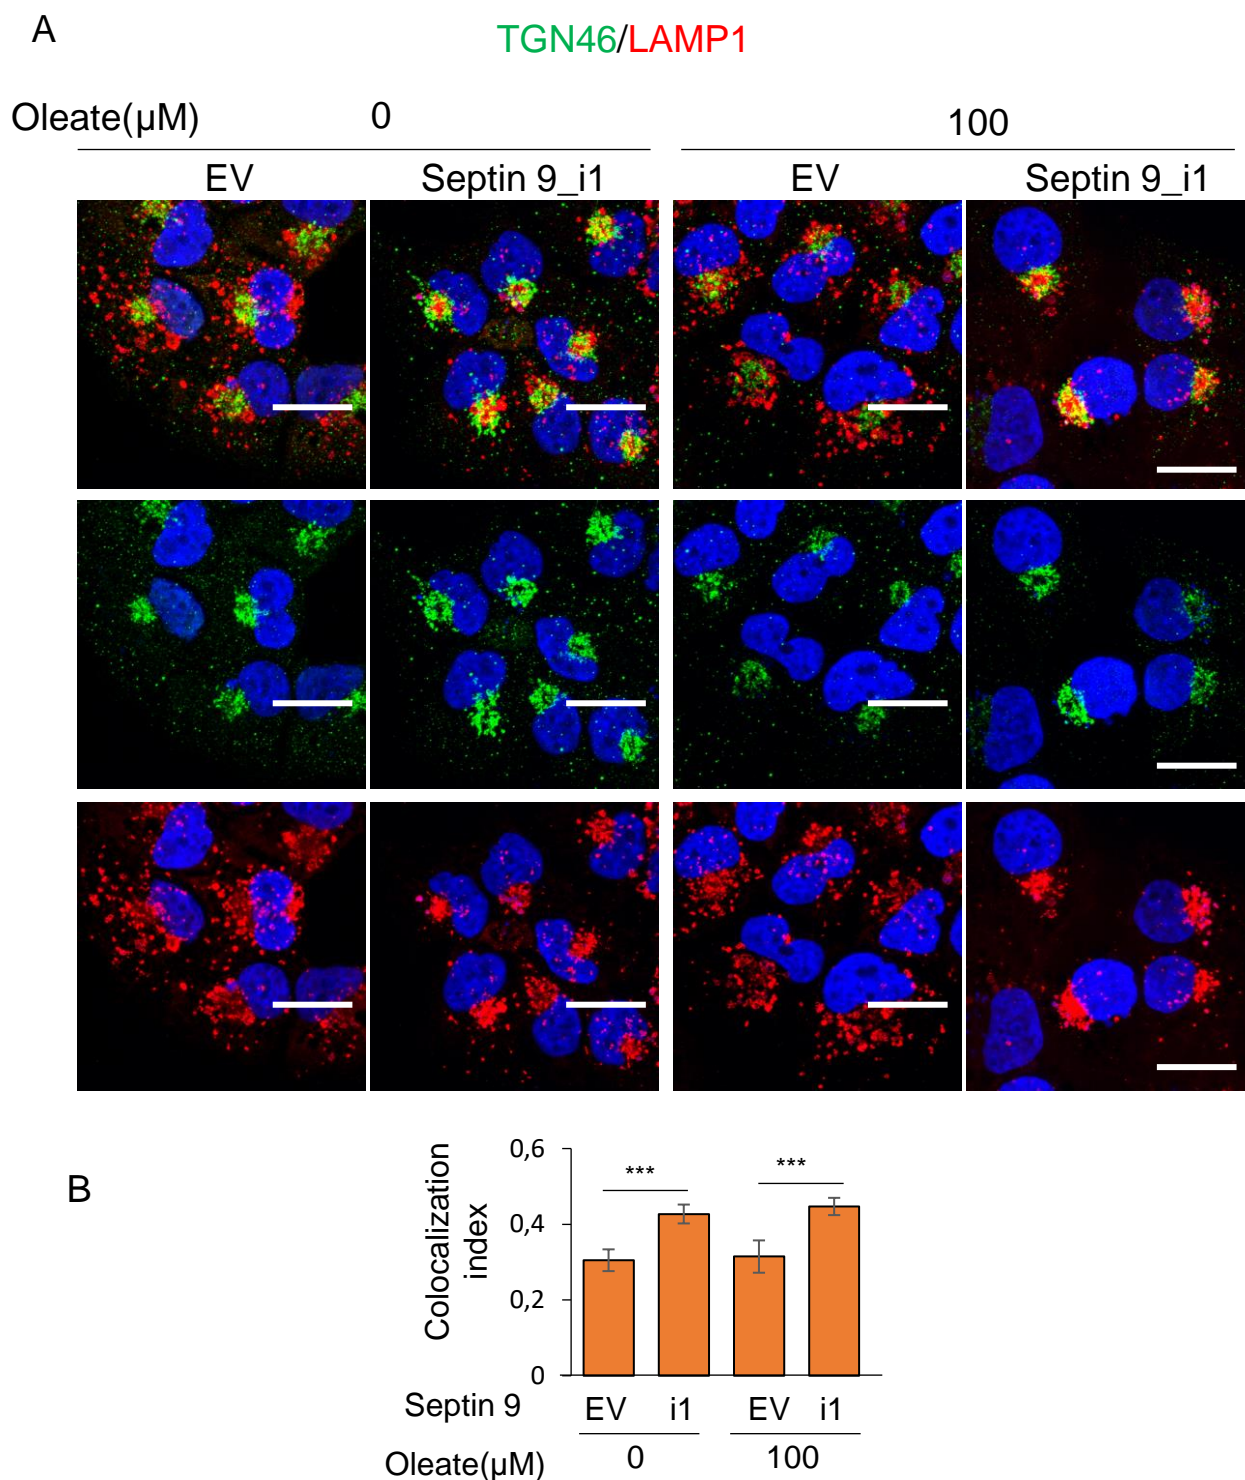

**Figure S4 Septin 9\_i1 overexpression maintains the colocalization of LAMP1 and TGN46**

**A.** Huh7 cells were transfected with EV or septin 9\_i1 were grown for 24h. Then culture medium was supplemented with 100  $\mu\text{M}$  sodium oleate complex for 72h, after treatment, cells were stained for TGN46 (green) and LAMP1 (red). Scale bar, 20 $\mu\text{m}$ .

**B.** Bar graphs show Pearson's correlation coefficient (Rr) for co-localization between LAMP1 and TGN46.

Data information: Bar graph present Mean  $\pm$  SEM. Student's t-test was used. \*P < 0.05, \*\*P < 0.001, \*\*\*P < 0.0001.

Figure S5 MTs increase in LD accumulated cells and associate with LAMP1 perinuclear clusters, related to Figure 4

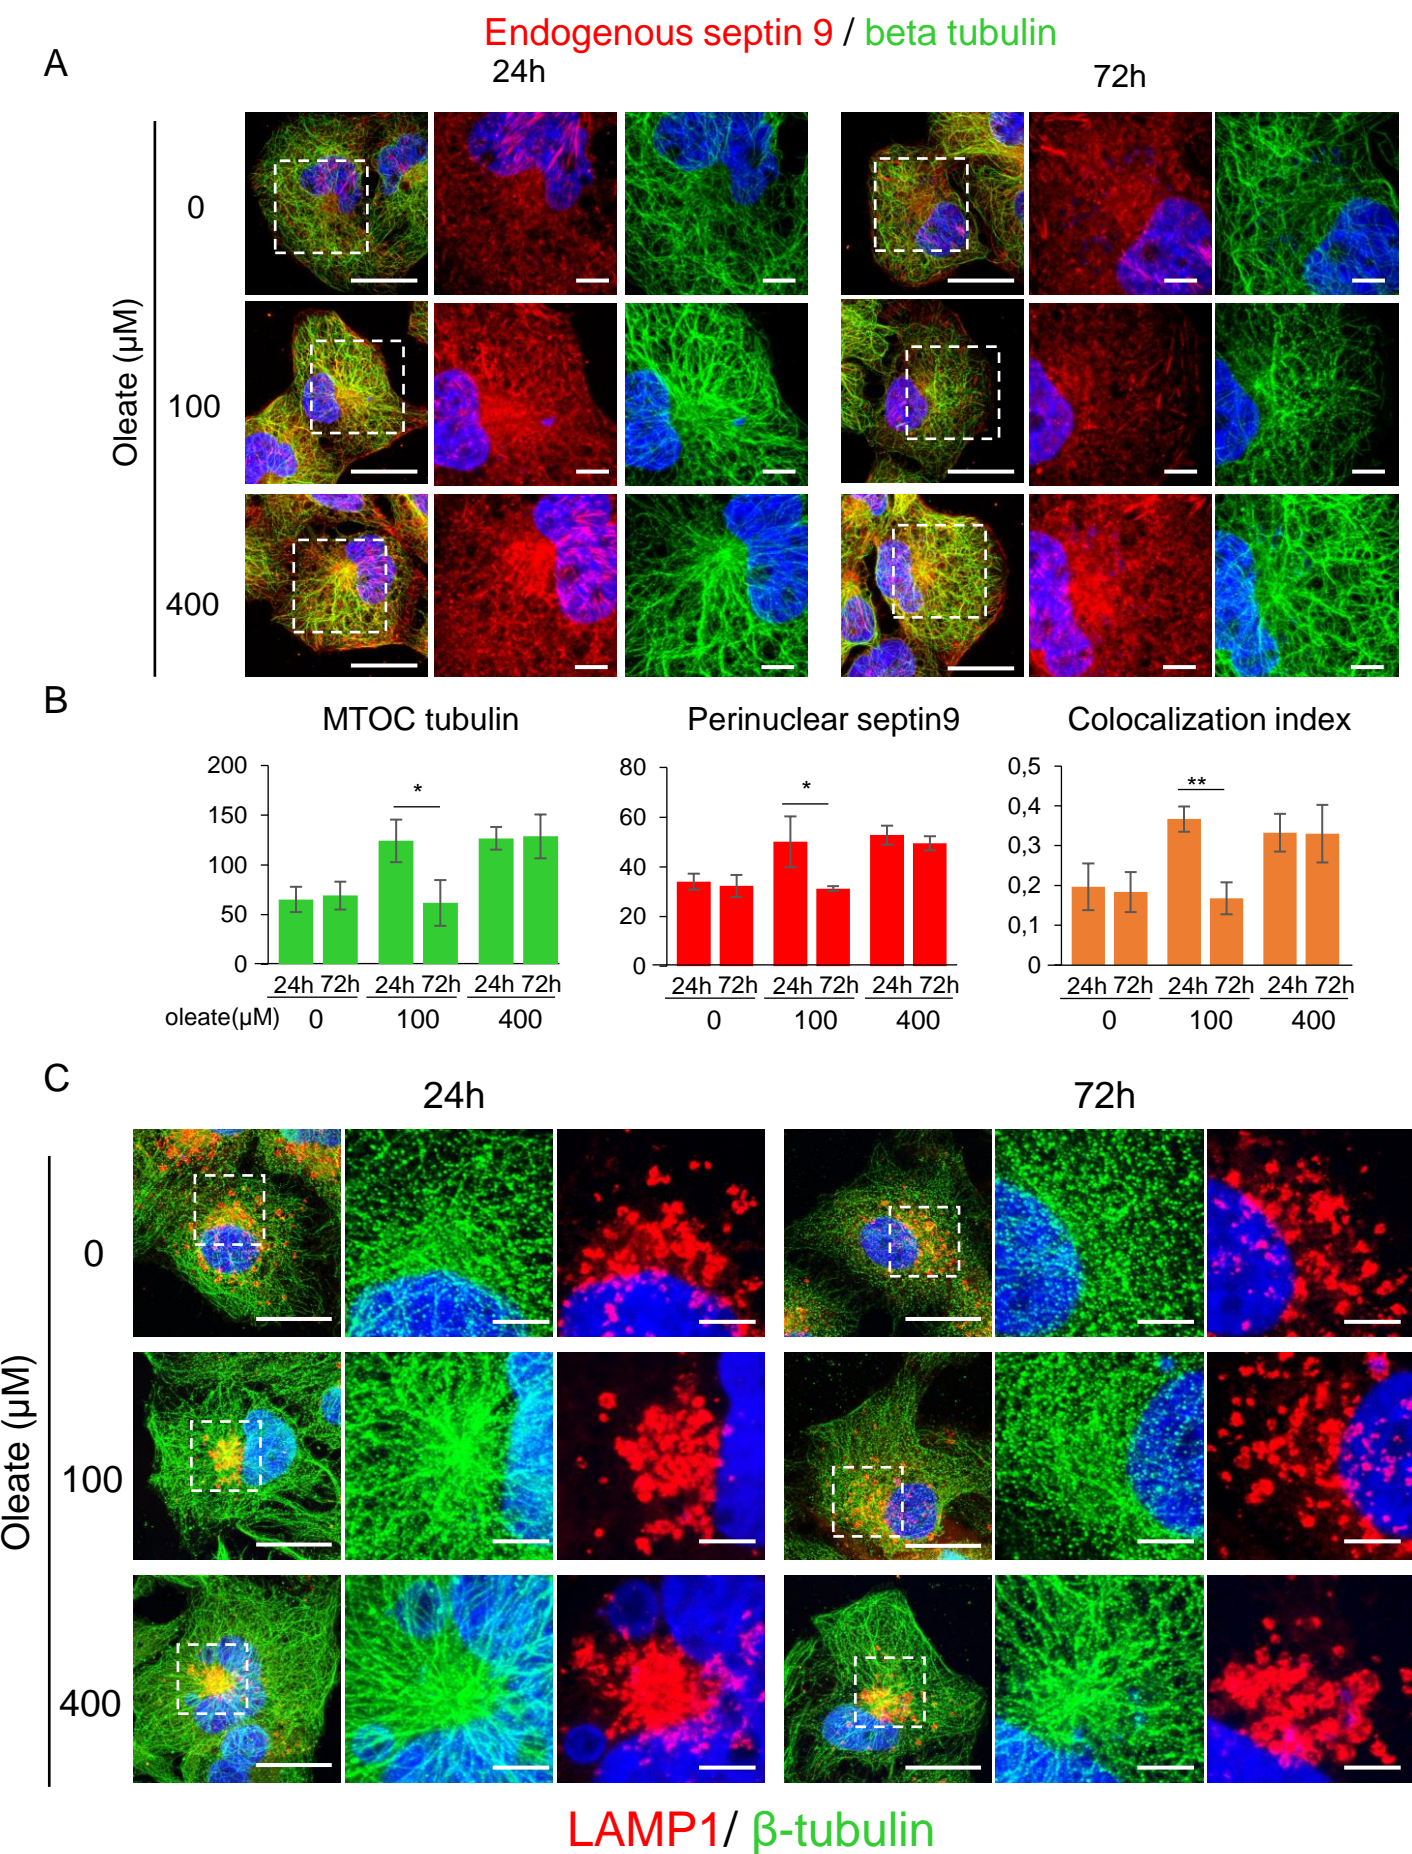

**Figure S5 MTs increase in LD accumulated cells and associate with LAMP1 perinuclear clusters**

**A.** Huh7 cells were culture with medium supplemented without or with 100 and 400  $\mu$ M oleate complex for 24h or 72h then stained for  $\beta$  tubulin(green) and septin 9 (red). Scale bar, 20 $\mu$ m. The dot squares indicate the zoom area. Scale bar, 5 $\mu$ m.

**B.** Bar graphs show mean intensity of  $\beta$ -tubulin in MTOC area, mean intensity of septin 9 in perinuclear area and Pearson's correlation coefficient (Rr) for co-localization between  $\beta$ -tubulin and septin 9 from 3 independent experiments performed as described in A.

**C.** Huh7 cells were grown overnight. Then culture medium was supplemented without or with 100 and 400  $\mu$ M sodium oleate complex for different time (24h, 72h), then stained for LAMP1 (red) and  $\beta$  tubulin (green). Scale bar, 20 $\mu$ m. The dot squares indicate the zoom area. Scale bar, 5 $\mu$ m.

Data information: Bar graphs present Mean  $\pm$  SEM. Student's t-test was used. \*P < 0.05, \*\*P < 0.001, \*\*\*P < 0.0001.

Figure S6 Oleate treatment promotes colocalization of Rab7 with LAMP1 in the perinuclear area, related to Figure 6

A

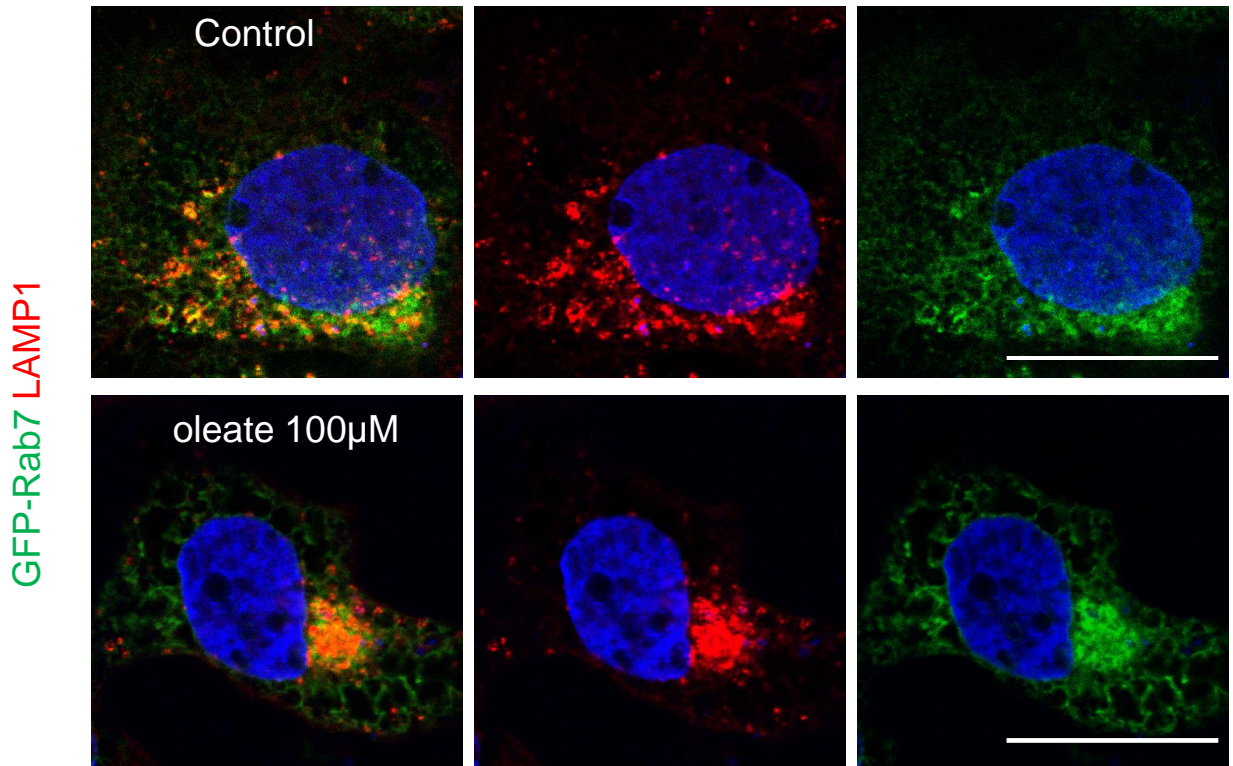

**Figure S6 Oleate treatment promotes colocalization of Rab7 with LAMP1 in the perinuclear area**

A. Huh7 cells expressed GFP-Rab7 were culture medium supplemented with or without 100  $\mu$ M oleate for 24h, then stained for LAMP1 (red).



Figure S7 Septin 9 regulates the intracellular distribution of endogenous Rab7, related to Figure 6

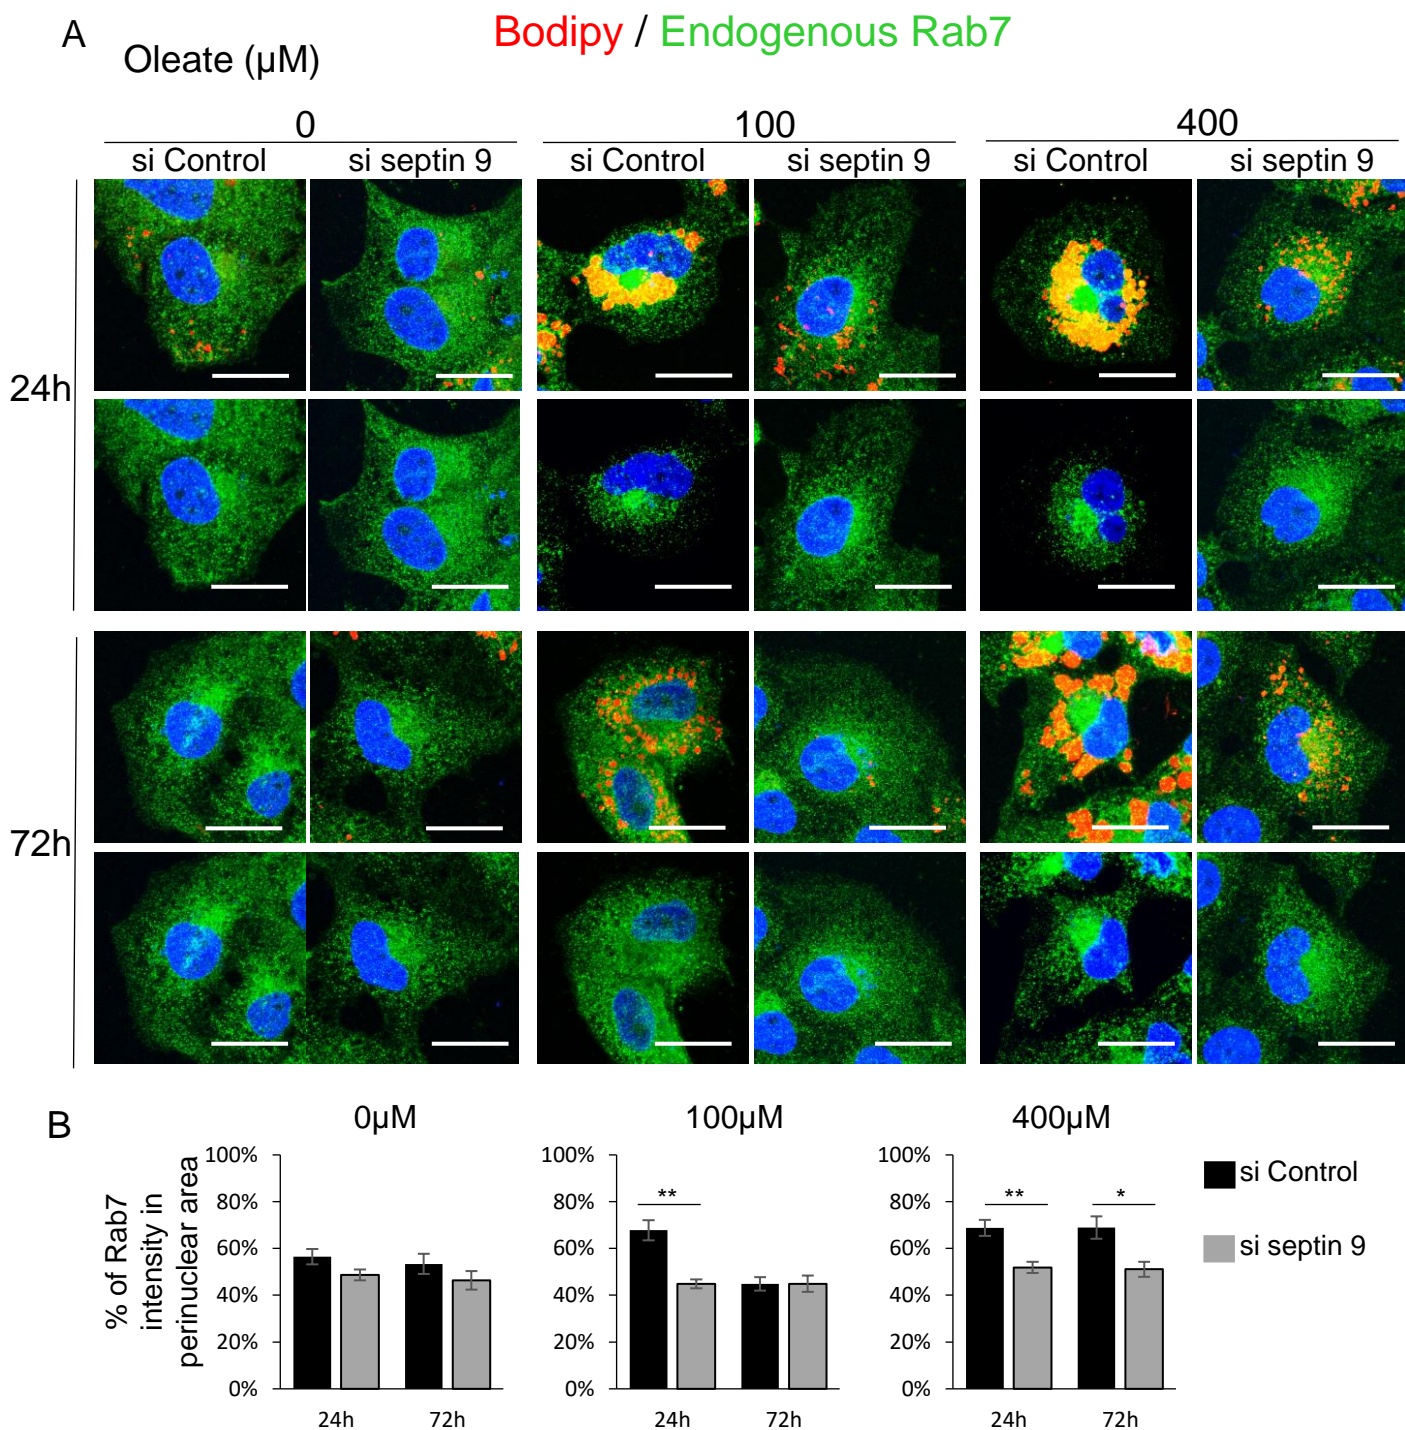

**Figure S7 Septin 9 regulates the intracellular distribution of endogenous Rab7**

**A.** Huh7 cells were transfected with or not septin 9-siRNA for 24h then culture with medium supplemented with or not 100, 400  $\mu\text{M}$  oleate for different time (24, 72h). Then stained for Rab7 (green) and BODIPY (red). Scale bar, 20 $\mu\text{m}$ .

**B.** Bar graphs show the percentage of Rab7 intensity in perinuclear area from two different experiments.

Data information: Bar graphs present Mean  $\pm$  SEM. Student's t-test was used. \*P < 0.05, \*\*P < 0.001, \*\*\*P < 0.0001.

Figure S8 Septin 9 promotes Rab7 perinuclear clustering and its colocalization with Golgi, related to Figure 6

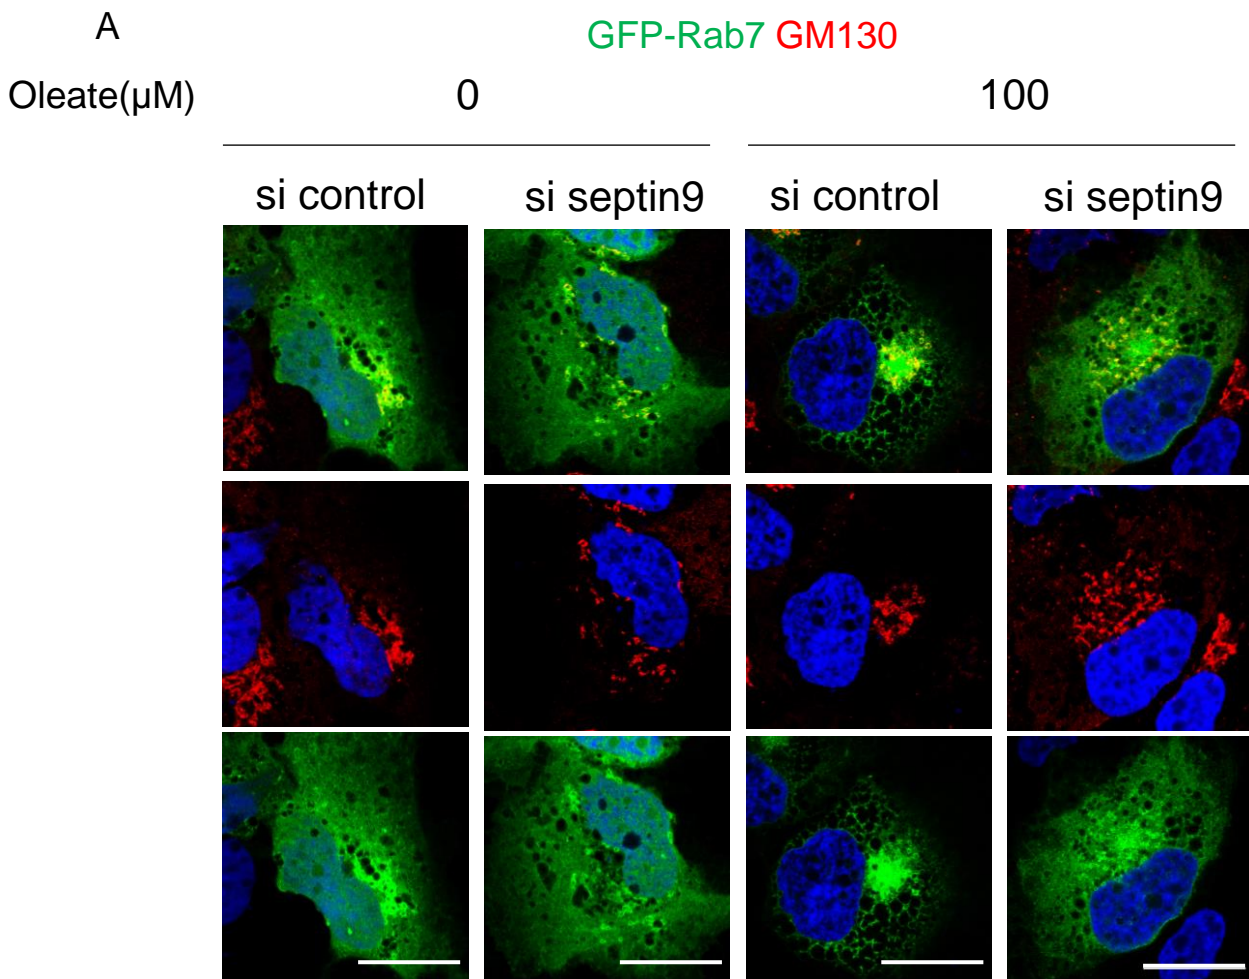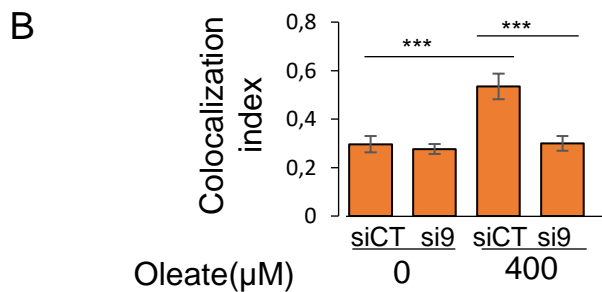

**Figure S8 Septin 9 promotes Rab7 perinuclear clustering and its colocalization with Golgi**

**A.** GFP-Rab7 expressed Huh7 cells were transfected with or not septin 9-siRNA for 24h then culture with medium supplemented with or not 400  $\mu\text{M}$  oleate for 72h then stained for TGN46(red). Scale bar, 20 $\mu\text{m}$ .

**B.** Bar graphs show Pearson's correlation coefficient (Rr) for co-localization between Rab7 and TGN46.

Data information: Bar graphs present Mean  $\pm$  SEM. Student's t-test was used. \*P < 0.05, \*\*P < 0.001, \*\*\*P < 0.0001.

Figure S9 Septin 9 promotes the LC3B accumulation, related to Figure 6

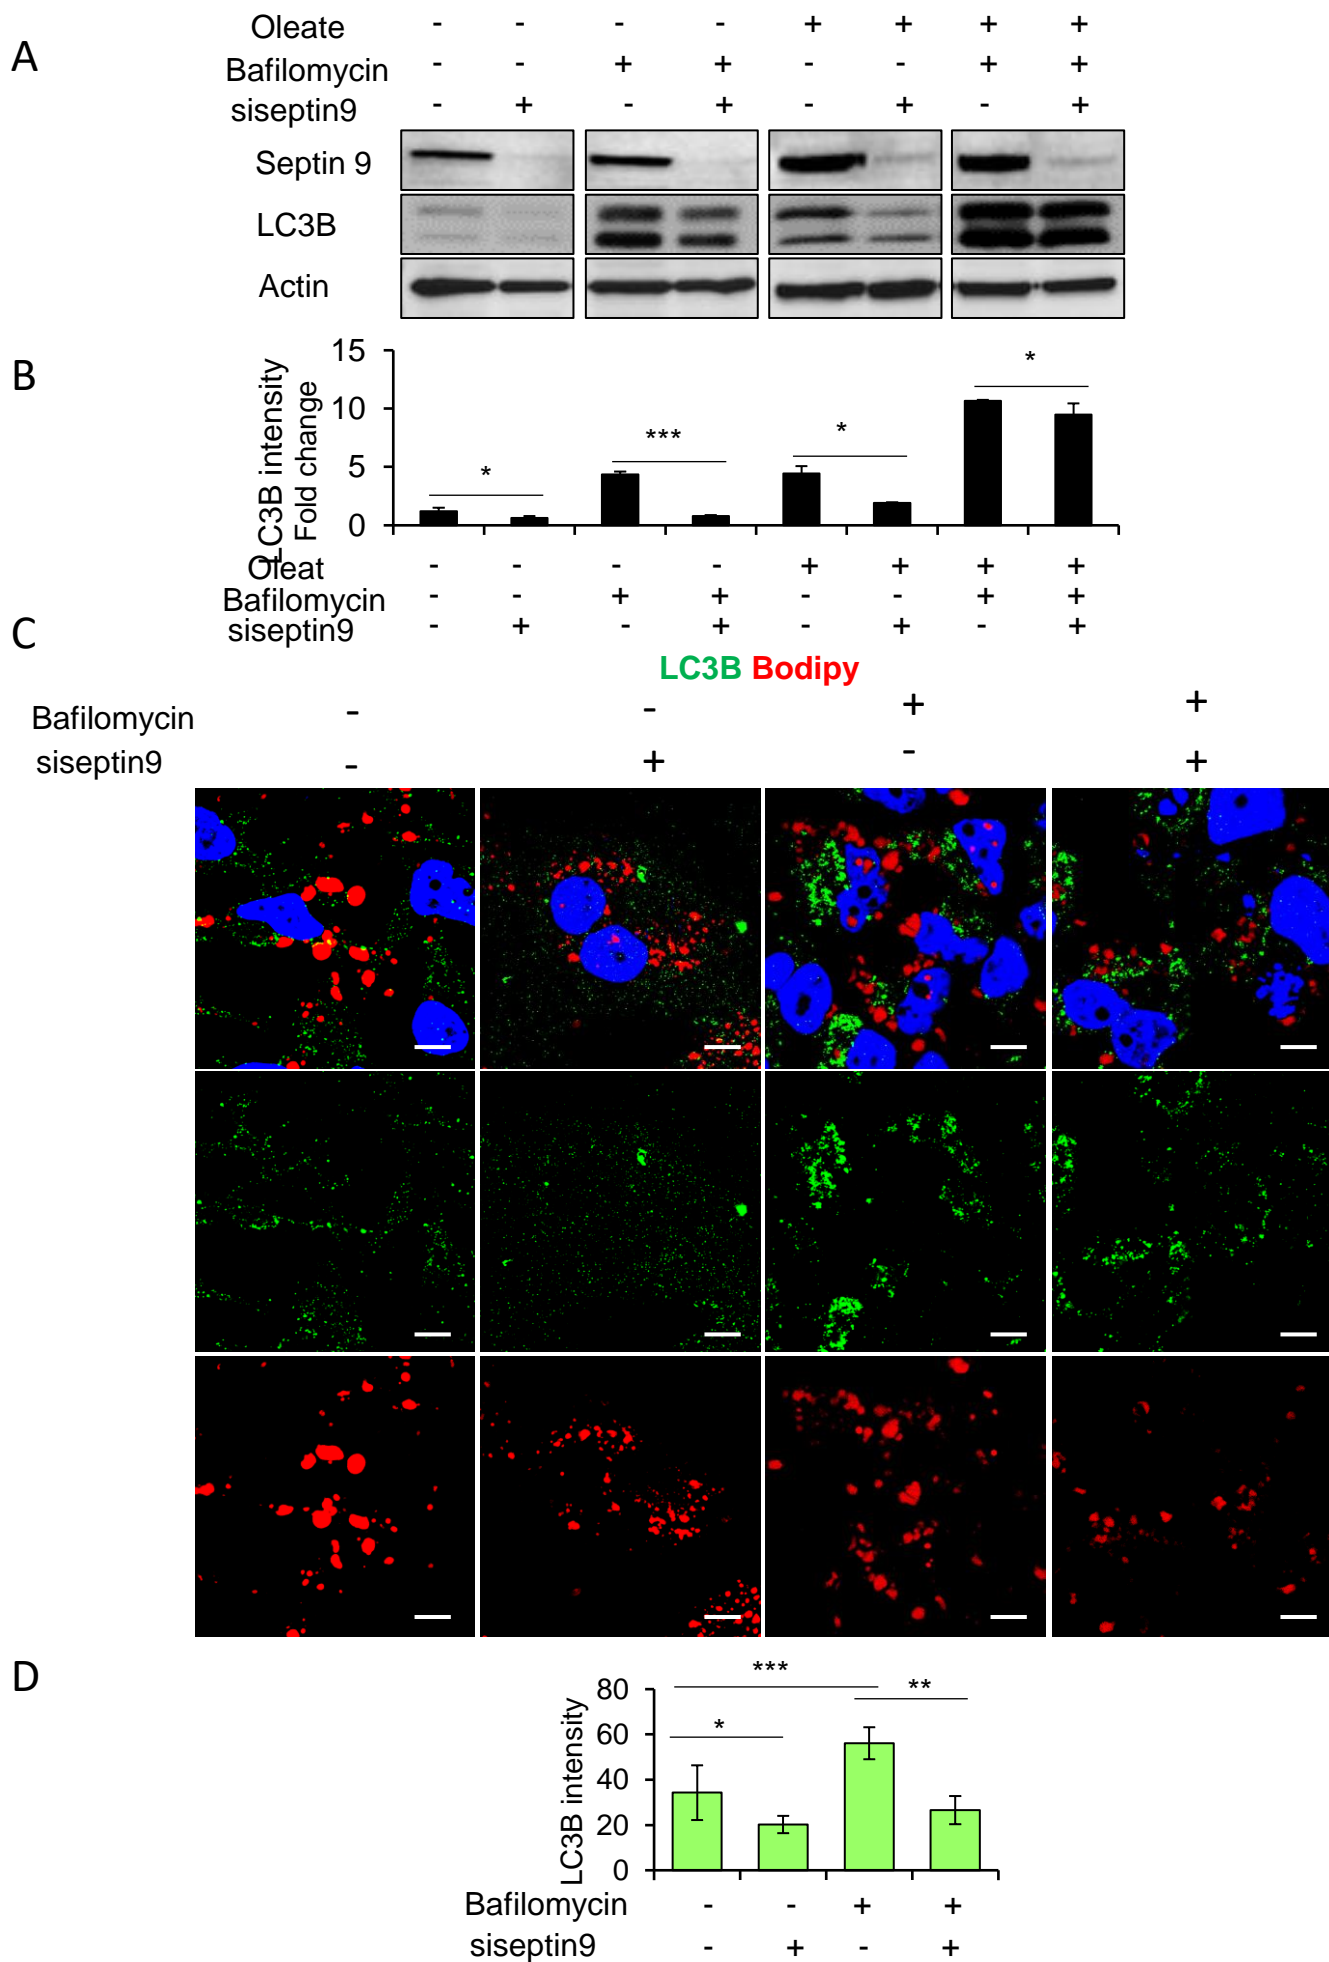

**Figure S9 Septin 9 promotes the LC3B accumulation**

**A.** Huh7 cells were grown overnight. The cells were then transfected with siseptin9 for 24 h, then added 100nM Bafilomycin, 100 $\mu$ M Oleate, or not for further treatment. After another 24h, the cells were collected and analyzed by immunoblotting for septin 9 and LC3B.

**B.** Three independent experiments were performed, Bar graphs present the mean  $\pm$  SEM. A Student's t-test was used: \*\* p < 0.001, and \*\*\* p < 0.0001.

**C.** The cells are treated in the manner described in A, and then stained for LC3B(green) and Bodipy (red). Scale bar, 10  $\mu$ m.

**D.** The LC3B intensity was analyzed at least 30 cells from the experiments. Bar graphs present the mean  $\pm$  SEM. A Student's t-test was used: \*\* p < 0.001, and \*\*\* p < 0.0001.

# Figure S10 PIs regulates septin 9 association with LDs, related to Figure 7

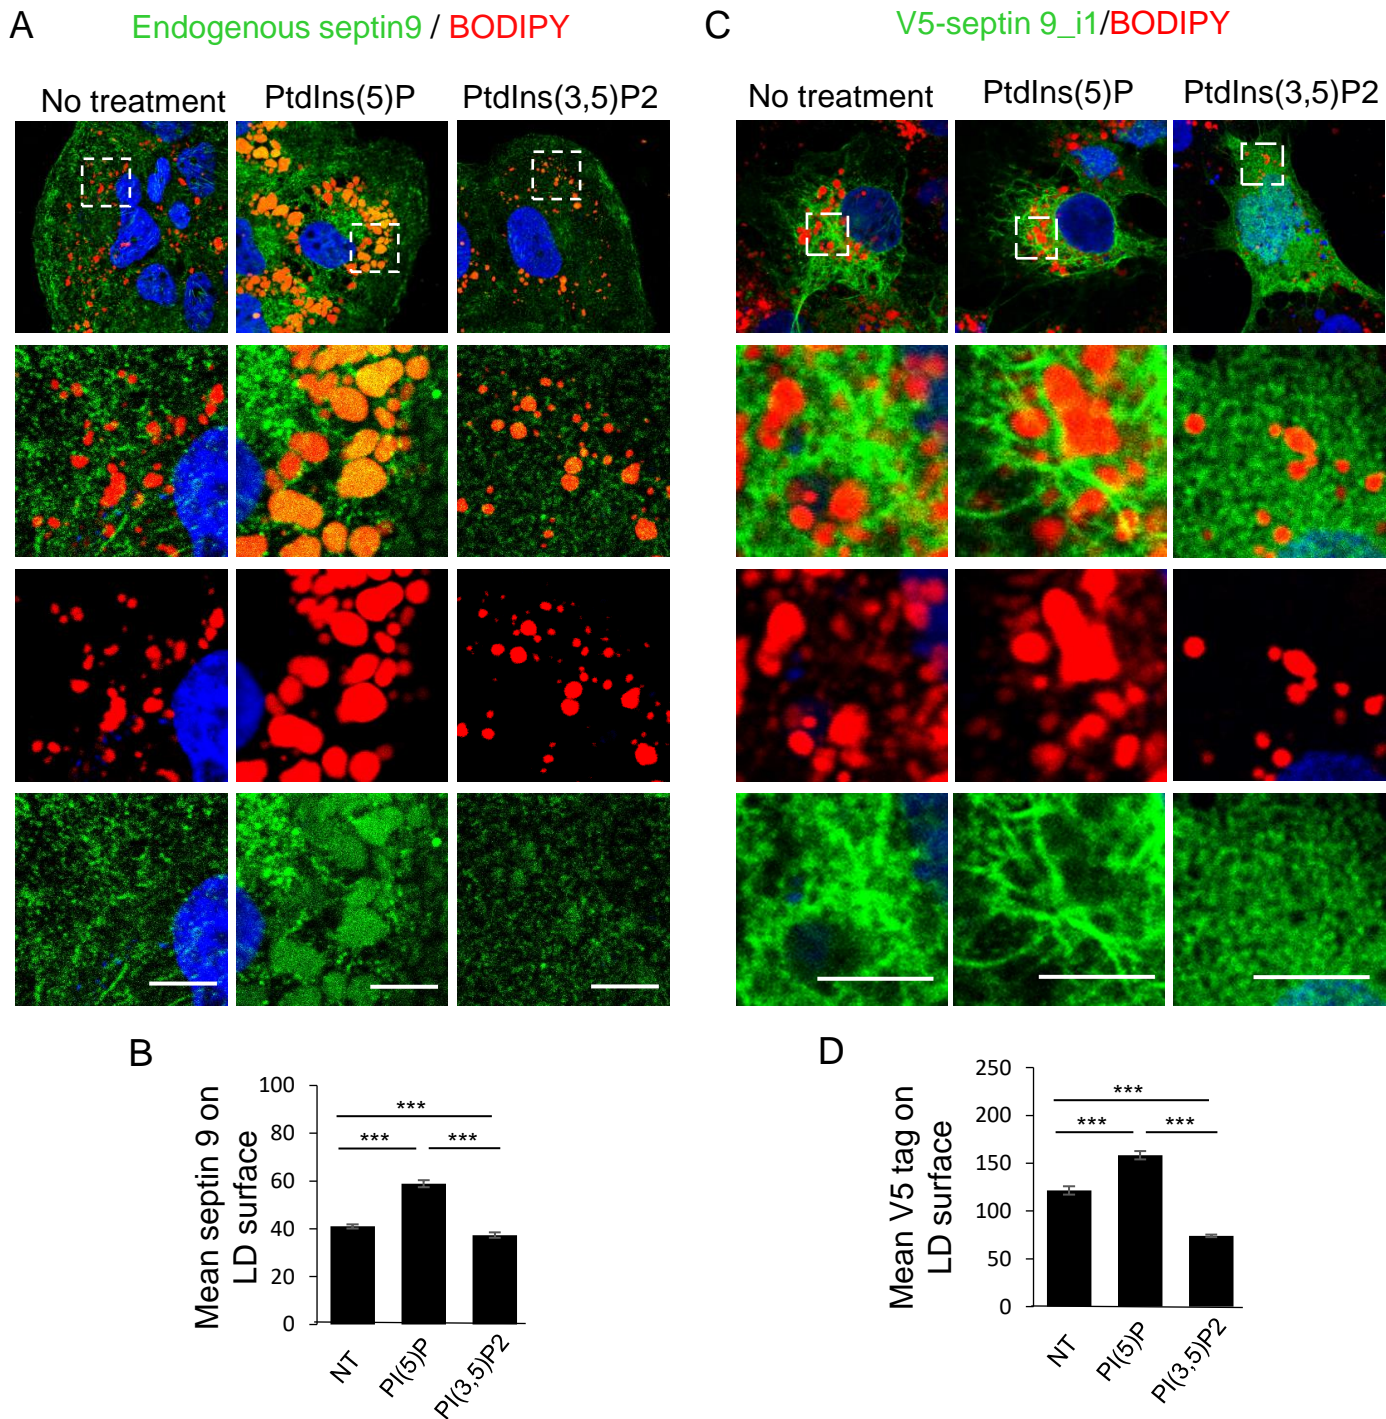

## Figure S10 PIs regulates septin 9 association with LDs

**A.** Huh7 cells treated with cell-permeant PtdIns5P or PtdIns (3,5) P2 at 30 mM for 15 min before fixing and staining for endogenous septin 9 (green) and LDs (red). The dot squares indicate the zoom area. Scale bar, 5 $\mu$ m.

**B.** Bar graphs show the mean intensity of endogenous septin 9 on LDs from two independent experiments performed as described in A.

**C.** Huh7 cells transfected with or without septin 9\_i1 were cultured for 24h. Then, cells were treated with cell-permeant PtdIns5P or PtdIns (3,5) P2 at 30 mM for 15 min before fixing and staining for V5-tag (green) and LDs (red). The dot squares indicate the zoom area. Scale bar, 5 $\mu$ m.

**D.** Bar graphs show the mean intensity of V5-tag on LDs from three independent experiments performed as described in C.

Data information: Bar graphs present Mean  $\pm$  SEM. Student's t-test was used. \*P < 0.05, \*\*P < 0.001, \*\*\*P < 0.0001.

Figure S11 PIs and MTMR3 regulate septin 9 and MT accumulation at MTOC, related to Figure 8

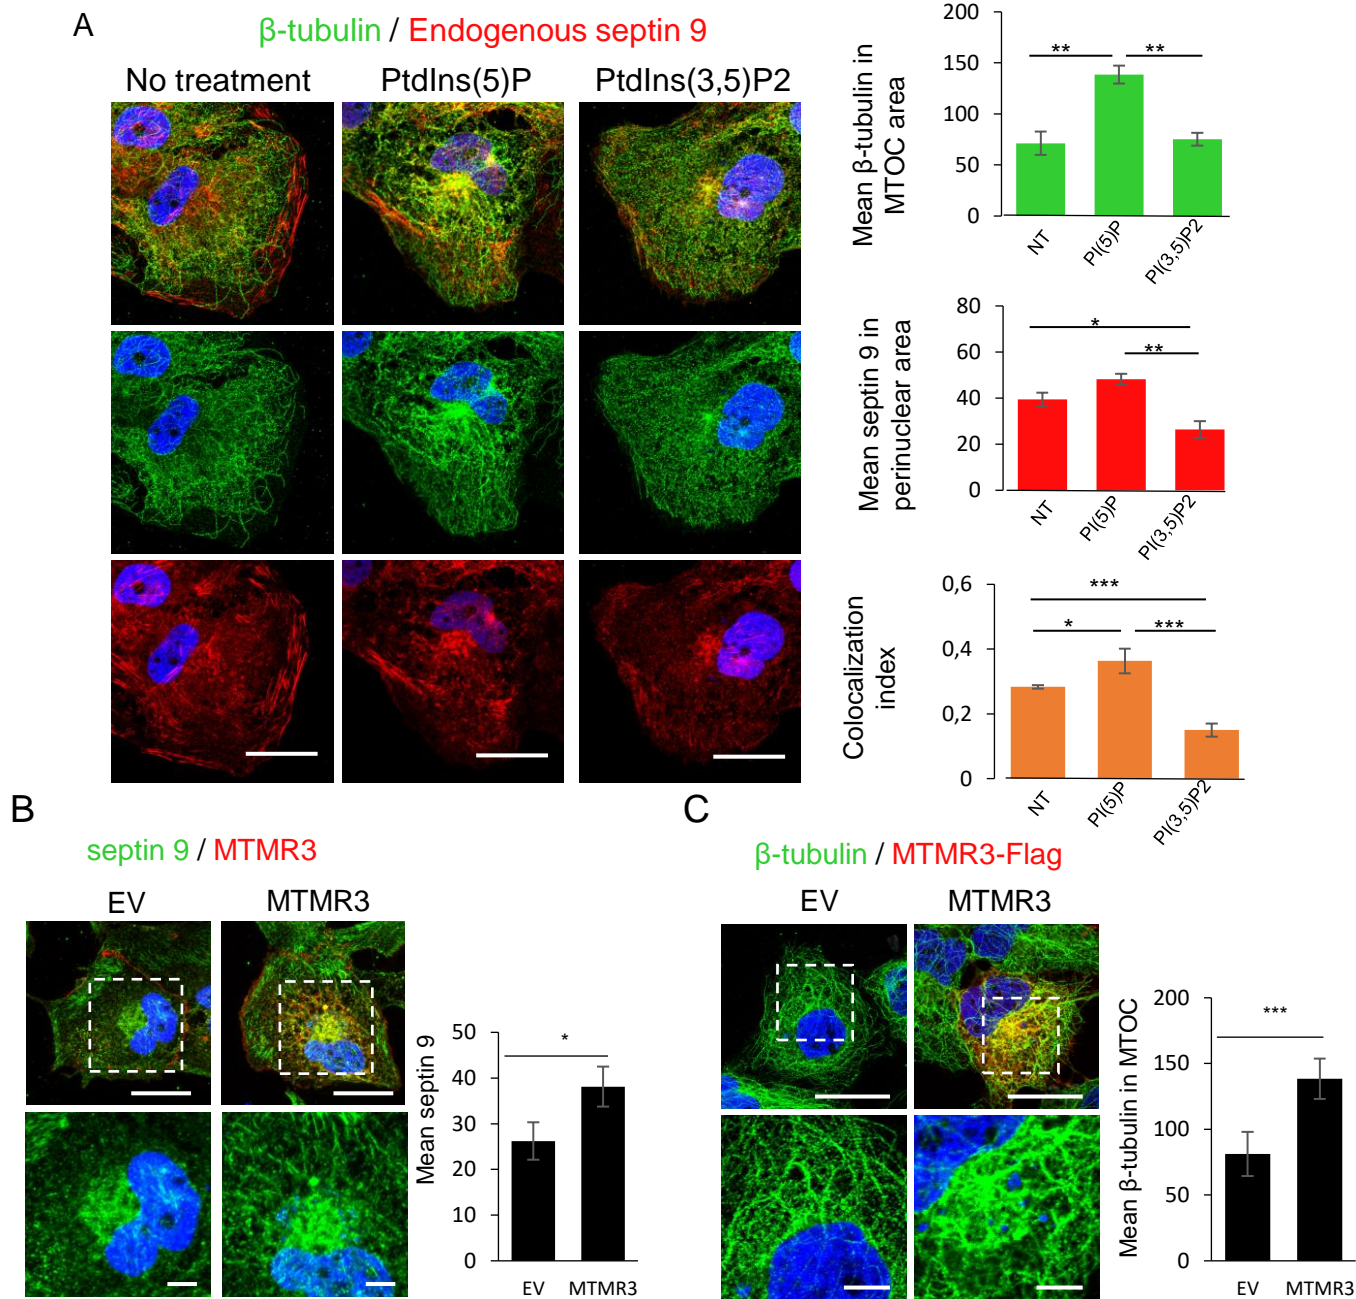

**Figure S11 PIs and MTMR3 regulate septin 9 and MT accumulation at MTOC**

**A.** Huh7 cells treated with cell-permeant PtdIns5P or PtdIns (3,5) P2 at 30 mM for 15 min before fixing and staining for endogenous septin 9 (red) and  $\beta$ -tubulin (red). Scale bar, 20 $\mu$ m. Bar graphs show mean intensity of  $\beta$ -tubulin in MTOC area, mean intensity of septin 9 in perinuclear area and Pearson's correlation coefficient (Rr) for co-localization between  $\beta$ -tubulin and septin 9 from two independent experiments performed as described in A.

**B.** Huh7 cells were transfected with EV or MTMR3 were grown for 48h. Then, cells were stained for septin 9 (green)/ MTMR3 (red). Bar graphs show the mean intensity of septin 9 in perinuclear area from 2 independent experiments performed as described. Scale bar, 20 $\mu$ m. The dot squares indicate the zoom area. Scale bar, 5 $\mu$ m.

**C.** Huh7 cells were transfected with EV or MTMR3 were grown for 48h. Then, cells were stained for  $\beta$ -tubulin (green)/ Flag (red). Bar graphs show the mean intensity of  $\beta$ -tubulin in MTOC area from 2 independent experiments performed as described. Scale bar, 20 $\mu$ m. The dot squares indicate the zoom area. Scale bar, 5 $\mu$ m.

Data information: Bar and line graphs present Mean  $\pm$  SEM. Student's t-test was used. \*P < 0.05, \*\*P < 0.001, \*\*\*P < 0.0001.

Figure S12 uncropped scans, related to Figure 2, Figure 4 and Figure S9

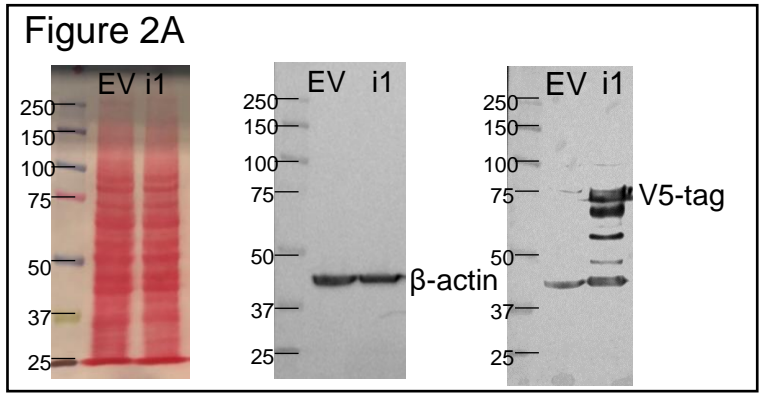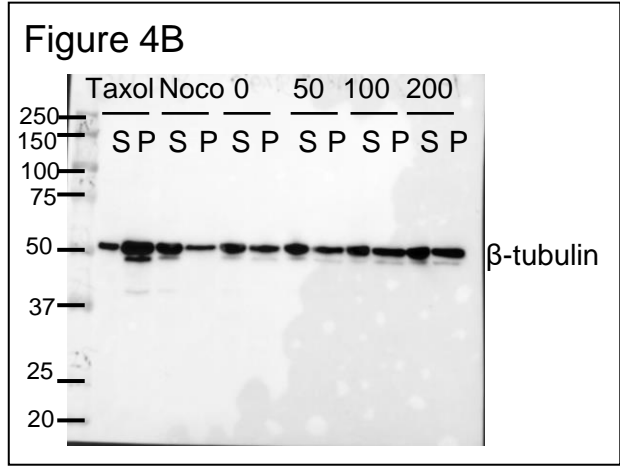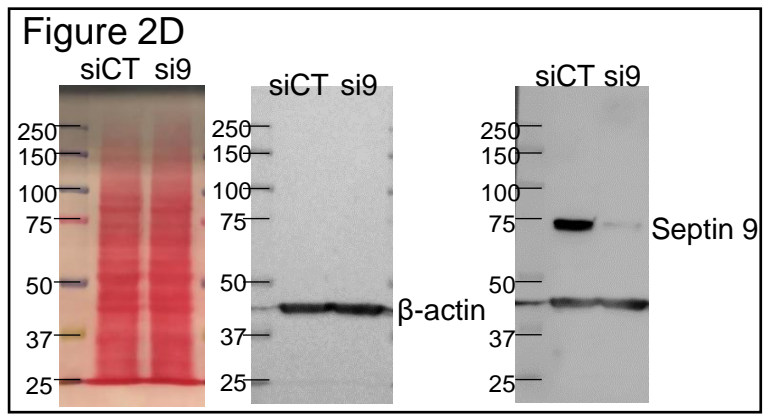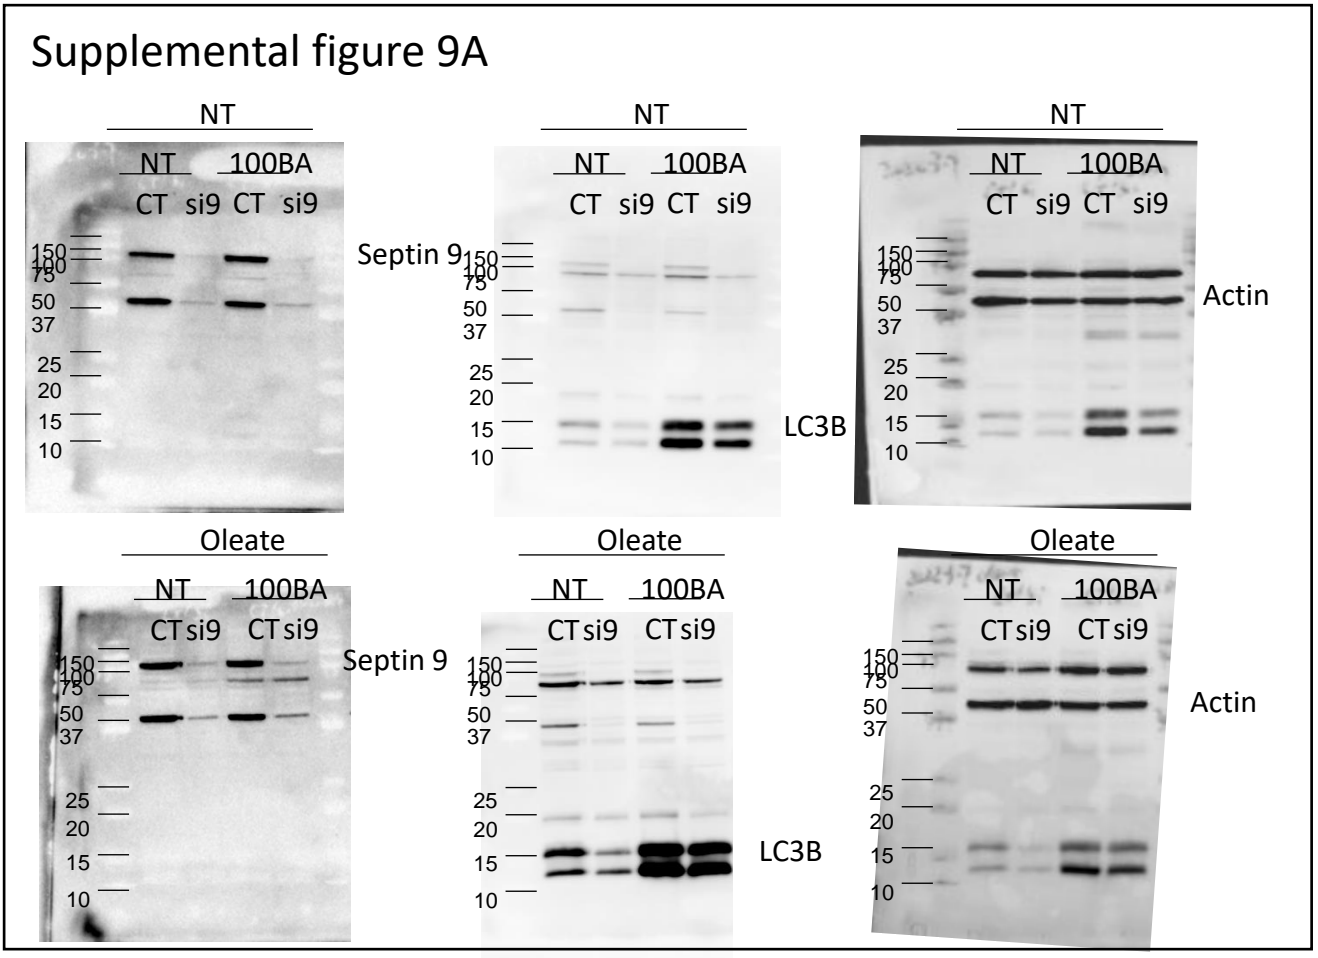

Figure S13 Schematic diagram of statistical methods for image signal calculation, related to STAR + Methods

A. Methods for protein signal in perinuclear and perinuclear area.

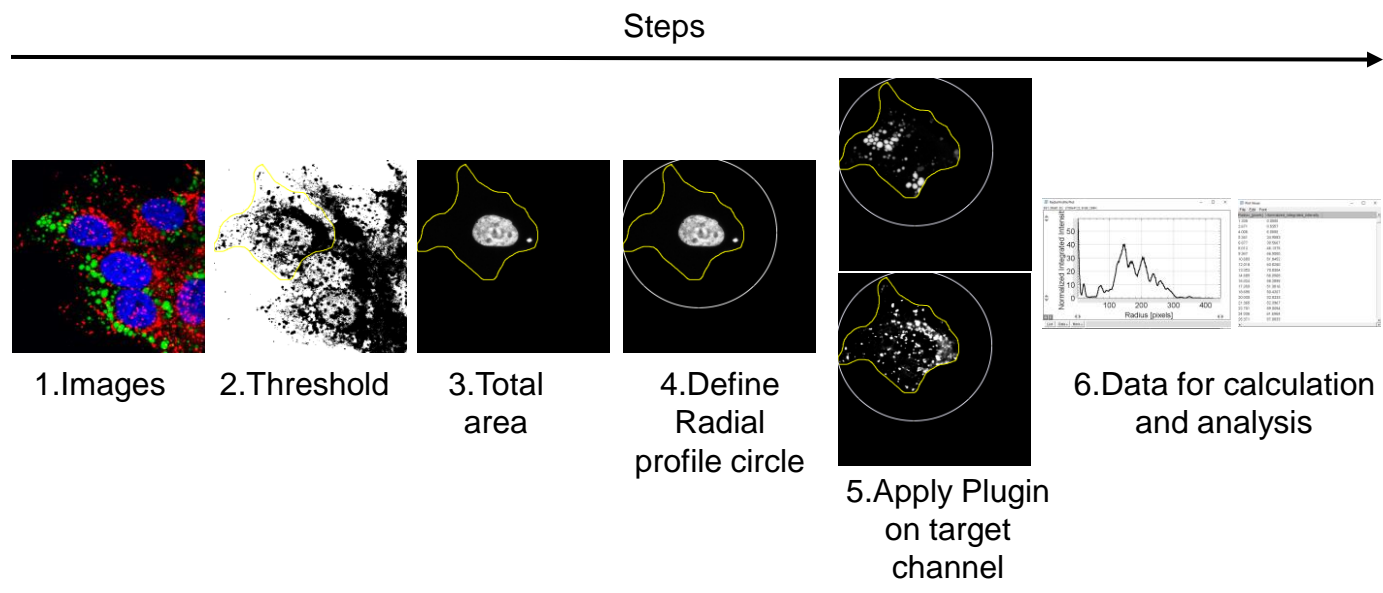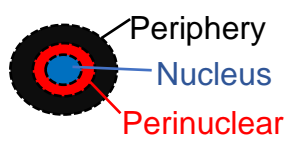

$$\% \text{ of intensity in perinuclear area} = \frac{\text{Intensity within perinuclear area}}{\text{Intensity within total cell area}} \times 100\%$$

B. Method for protein signal around LDs.

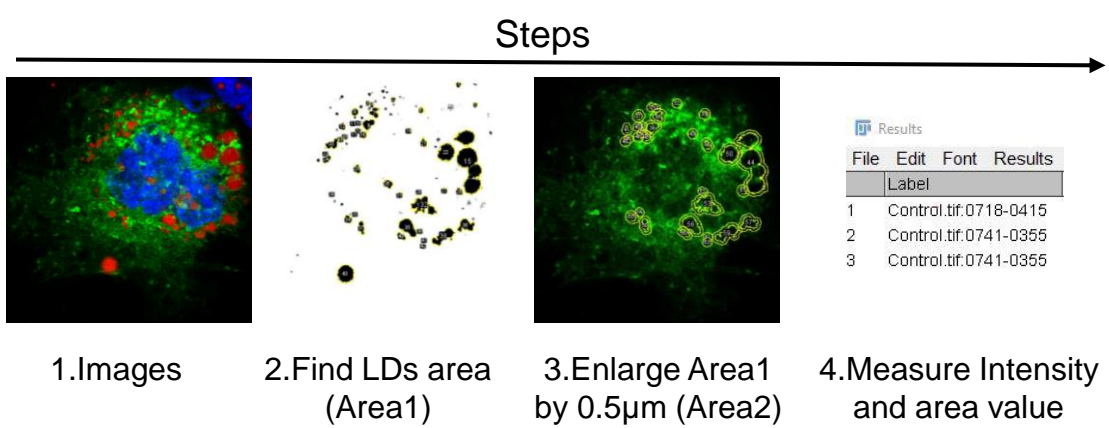

$$\text{Mean intensity} = \frac{(\text{Intensity within Area2}) - (\text{Intensity within Area1})}{(\text{Area2 value}) - (\text{Area1 value})}$$
